# Supplementary material
Source: HighWire-hosted journal article supplement (https://www.annfammed.org/highwire/filestream/26857/field_highwire_adjunct_files/0/Williams_VA_Final.pdf)
Supplement: Williams_VA_Final.pdf [file Williams_VA_Final.pdf]

# Heplisav-B vs Standard Hepatitis B Booster for Previously Vaccinated Medical Students With Low Immunity

This retrospective cohort study used existing health record data to evaluate the immune response of 242 previously vaccinated individuals with low immunity who received a single booster dose of either Heplisav-B or a standard hepatitis B vaccine.

**Heplisav-B vs Standard Hepatitis B Booster: Percentage of Individuals Reaching Protective Antibody Levels**

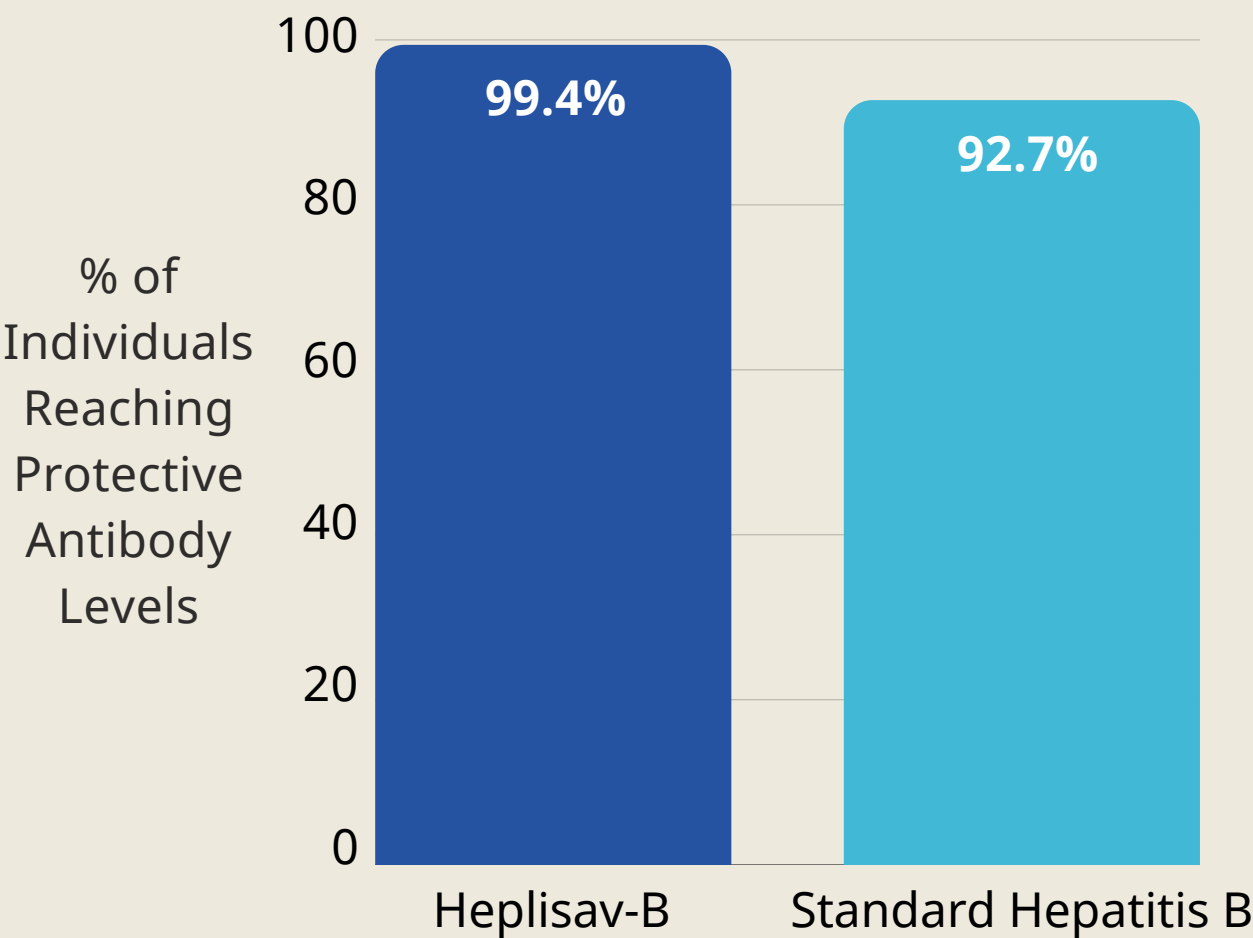

The 6.7% higher response rate with Heplisav-B was statistically significant (95% CI, 1.9%-14.5%;  $P = .003$ ).

*Source:* Williams AL, Newman RS. Heplisav-B vs standard hepatitis B vaccine booster for health care workers. *Ann Fam Med*. 2025;23:10.1370/afm.240184
